# Supplementary material
Source: PubMed Central journal article supplement (PMC4794208)
Supplement: vigs021969.w1_default.pdf [file vigs021969.w1_default.pdf]

**Table S1. List of data sources and codes used to define exposure and outcomes.**

| Variable type                                                                | Database source(s) | Code(s)                                                                                                                                                                                                                            |
|------------------------------------------------------------------------------|--------------------|------------------------------------------------------------------------------------------------------------------------------------------------------------------------------------------------------------------------------------|
| <b>Exposures</b>                                                             |                    |                                                                                                                                                                                                                                    |
| <b>Oral and injectable antipsychotic medications</b>                         |                    |                                                                                                                                                                                                                                    |
| <i>First-generation (“typical”)</i>                                          | ODB                | Haloperidol, Fluphenazine, Trifluoperazine, Zuclopenthixol, Perphenazine, Prochlorperazine, Thiothixene, Pimozide, Chlorazepate, Pipotiazine, Loxapine, Mesoridazine, Thioridazine, Chlorpromazine, Methotrimeprazine, Pericyazine |
| <i>Second-generation (“atypical”)</i>                                        | ODB                | Risperidone, Olanzapine, Quetiapine, Ziprasidone, Paliperidone, Aripiprazole                                                                                                                                                       |
|                                                                              |                    |                                                                                                                                                                                                                                    |
| <b>Main outcomes</b>                                                         |                    |                                                                                                                                                                                                                                    |
| <b>Main maternal medical outcomes</b>                                        |                    |                                                                                                                                                                                                                                    |
| <i>Gestational diabetes mellitus</i>                                         | CIHI-DAD /OHIP     | ICD 10-CA E10, E11, E13, E14, O244 <u>or</u> 2 OHIP 250                                                                                                                                                                            |
| <i>Hypertensive disorders of pregnancy</i>                                   | CIHI-DAD/OHIP      | ICD-10 CA I10, I15 <u>or</u> O14, O15 <u>or</u> 2 OHIP 401                                                                                                                                                                         |
| <i>Venous thromboembolism</i>                                                | CIHI-DAD/OHIP      | ICD-10-CA I80.1, I80.2, I80.3, I26.0, I26.9 or OHIP 451,415                                                                                                                                                                        |
| <b>Main perinatal outcomes</b>                                               |                    |                                                                                                                                                                                                                                    |
| <i>Preterm birth &lt; 37 weeks gestation</i>                                 | MOMBABY            | b_gestwks_del (newborn gestational weeks at delivery)                                                                                                                                                                              |
| <i>Small for gestational age birthweight &lt; 3<sup>rd</sup> percentile</i>  | MOMBABY            | b_gestwks_del; baby_bwt                                                                                                                                                                                                            |
| <i>Large for gestational age birthweight &gt; 97<sup>th</sup> percentile</i> | MOMBABY            | b_gestwks_del; baby_bwt                                                                                                                                                                                                            |
|                                                                              |                    |                                                                                                                                                                                                                                    |
| <b>Secondary outcomes</b>                                                    |                    |                                                                                                                                                                                                                                    |
| <b>Obstetrical conditions and complications*</b>                             |                    |                                                                                                                                                                                                                                    |
| <i>Placental abruption</i>                                                   | CIHI-DAD           | ICD 10-CA: O45                                                                                                                                                                                                                     |
| <i>Placental infarction</i>                                                  | CIHI-DAD           | ICD 10-CA: O43.1,O43.8,O43.9                                                                                                                                                                                                       |
| <i>Septic shock</i>                                                          | CIHI-DAD           | ICD 10-CA: O75.3,O85                                                                                                                                                                                                               |
| <i>Peripartum hemorrhage</i>                                                 | CIHI-DAD           | ICD 10-CA: O46,O67,O72                                                                                                                                                                                                             |
| <b>Labour and delivery</b>                                                   |                    |                                                                                                                                                                                                                                    |
| <i>Labour induction</i>                                                      | CIHI-DAD           | CCI: 5.AC.30                                                                                                                                                                                                                       |
| <i>Caesarean section</i>                                                     | CIHI-DAD           | CCI 5.MD.60                                                                                                                                                                                                                        |
| <i>Operative vaginal delivery</i>                                            | CIHI-DAD           | CCI 5.MD.53, 54,55, 5MD56PC/PF/PJ                                                                                                                                                                                                  |
| <i>Major perineal trauma (3<sup>rd</sup> or 4<sup>th</sup> degree tear)</i>  | CIHI-DAD           | CCI 5.MD.50.GH, 5.MD.53.KS/JE/KL/KN/KJ, 5.MD.54.KJ/KL/KN/NF, 5.MD.55.KN/KL/KJ/KR, 5.MD.56PA/PB/PC/PD/PE/PF/PG/PH/PJ, 5.PC.80.JN, 5.PD.13.SB                                                                                        |

| Variable type                                                    | Database source(s) | Code(s)                                                             |
|------------------------------------------------------------------|--------------------|---------------------------------------------------------------------|
| <i>Transfer to intensive care unit</i>                           | CIHI-DAD           | Location variable: special care unit                                |
| <b>Maternal readmission to hospital</b>                          |                    |                                                                     |
| <i>Any readmission (≤ 7 days)</i>                                | CIHI-DAD/OMHRS     | Any admission                                                       |
| <i>Any readmission (1 to 12 weeks)</i>                           | CIHI-DAD/OMHRS     | Any admission                                                       |
| <i>Non-mental health (≤ 7 days)</i>                              | CIHI-DAD           | Any CIHI-DAD except mental health admission (below)                 |
| <i>Non-mental health (1 to 12 weeks)</i>                         | CIHI-DAD           | Any CIHI-DAD except mental health admission (below)                 |
| <i>Mental health ≤ 7 days</i>                                    | CIHI-DAD/OMHRS     | ICD10 CA: F00.X - F99.X, G30.X, G31.X, R54.X or any OMHRS admission |
| <i>Mental health (1 to 12 weeks)</i>                             | CIHI-DAD/OMHRS     | ICD10 CA: F00.X - F99.X, G30.X, G31.X, R54.X or any OMHRS admission |
| <b>Perinatal indicators</b>                                      |                    |                                                                     |
| <i>Preterm birth &lt; 32 weeks gestation</i>                     | MOMBABY            | b_gestwks_del (newborn gestational weeks at delivery)               |
| <i>Preterm birth &lt; 28 weeks gestation</i>                     | MOMBABY            | b_gestwks_del (newborn gestational weeks at delivery)               |
| <i>Small for gestational age &lt; 10<sup>th</sup> percentile</i> | MOMBABY            | b_gestwks_del; baby_bwt                                             |
| <i>Large for gestational age &gt; 90<sup>th</sup> percentile</i> | MOMBABY            | b_gestwks_del; baby_bwt                                             |
| <b>Neonatal complications</b>                                    |                    |                                                                     |
| <i>Respiratory distress syndrome</i>                             | CIHI-DAD           | ICD 10 CA: P22.0                                                    |
| <i>Seizure</i>                                                   | CIHI-DAD           | ICD 10 CA: P90                                                      |
| <i>Sepsis</i>                                                    | CIHI-DAD           | ICD 10 CA: P36                                                      |
| <i>Intraventricular hemorrhage</i>                               | CIHI-DAD           | ICD 10 CA: I61.5, P10.2, P52.                                       |
| <i>Persistent fetal circulation</i>                              | CIHI-DAD           | ICD 10 CA: P29.3                                                    |
| <i>Neonatal adaptation syndrome</i>                              | CIHI-DAD           | ICD 10 CA: P96.1                                                    |
| <i>Congenital/neonatal infection</i>                             | CIHI-DAD           | ICD 10 CA: P23,P35,P37                                              |
| <i>Congenital malformations</i>                                  | CIHI-DAD           | ICD 10 CA: Q.00-Q.89                                                |
| <b>Maternal and perinatal mortality</b>                          |                    |                                                                     |
| <i>Stillbirth &gt; 20 weeks gestation</i>                        | MOMBABY            | m_stillbirth                                                        |
| <i>Neonatal mortality &lt; 90 days</i>                           | RPDB               | N/A                                                                 |
| <i>Maternal mortality 0 to 90 days postpartum</i>                | RPDB               | N/A                                                                 |

ODB: Ontario Drug Benefit; CIHI-DAD: Canadian Institute of Health Information Discharge Abstract Database (Hospitalization diagnostic and procedure codes), using the International Statistical Classification of Diseases and Related Health Problems, Tenth Revision, Canada (ICD-10-CA) and the Canadian Classification of Health Interventions (CCI) OHIP: Ontario Health Insurance Plan (Physician diagnostic claim codes); MOMBABY: ICES derived dataset from information in the CIHI-DAD, with maternal-child matching number on all in-hospital deliveries since 2002; OMHRS: Ontario Mental Health Reporting System, for all hospital admissions to registered mental health beds after 2005

RPDB: Registered persons database (in-hospital and out of hospital deaths)

**Table S2. List of the top 500 binary empirical covariates included in the high-dimensional propensity score, ranked by the strength of the covariate-exposure relation. All covariates were assessed within the year prior to conception.**

| Rank | Data Dimension | Code | Description of covariate                                                                                   | Type of binary covariate |
|------|----------------|------|------------------------------------------------------------------------------------------------------------|--------------------------|
| 1    | ODB            |      | BENZTROPINE MESYLATE                                                                                       | frequent                 |
| 2    | ODB            |      | BENZTROPINE MESYLATE                                                                                       | sporadic                 |
| 3    | OHIP           | 295  | Schizophrenia                                                                                              | frequent                 |
| 4    | ODB            |      | BENZTROPINE MESYLATE                                                                                       | once                     |
| 5    | ODB            |      | LITHIUM CARBONATE                                                                                          | frequent                 |
| 6    | OHIP           | 295  | Schizophrenia                                                                                              | sporadic                 |
| 7    | CIHI-DAD       | F60  | Specific personality disorders                                                                             | frequent                 |
| 8    | OHIP           | 295  | Schizophrenia                                                                                              | once                     |
| 9    | ODB            |      | DIVALPROEX SODIUM                                                                                          | frequent                 |
| 10   | OHIP           | 298  | Other psychoses                                                                                            | frequent                 |
| 11   | OHIP           | 298  | Other psychoses                                                                                            | sporadic                 |
| 12   | ODB            |      | LITHIUM CARBONATE                                                                                          | sporadic                 |
| 13   | OMHRS          | 301  | Personality disorders (e.g., paranoid personality, schizoid personality, obsessive compulsive personality) | frequent                 |
| 14   | OMHRS          | 296  | Manic depressive psychosis, involuntional melancholia                                                      | once                     |
| 15   | NACRS          | F31  | Bipolar affective disorder                                                                                 | once                     |
| 16   | OHIP           | 298  | Other psychoses                                                                                            | once                     |
| 17   | OMHRS          | 301  | Personality disorders (e.g., paranoid personality, schizoid personality, obsessive compulsive personality) | once                     |
| 18   | OHIP           | 296  | Manic depressive psychosis, involuntional melancholia                                                      | frequent                 |
| 19   | ODB            |      | DIVALPROEX SODIUM                                                                                          | sporadic                 |
| 20   | NACRS          | F60  | Specific personality disorders                                                                             | once                     |
| 21   | NACRS          | Z91  | Personal history of risk-factors, not elsewhere classified                                                 | once                     |
| 22   | ODB            |      | LITHIUM CARBONATE                                                                                          | once                     |
| 23   | OHIP           | 296  | Manic depressive psychosis, involuntional melancholia                                                      | sporadic                 |
| 24   | ODB            |      | LAMOTRIGINE                                                                                                | frequent                 |
| 25   | ODB            |      | CLONAZEPAM                                                                                                 | frequent                 |
| 26   | CIHI-DAD       | F60  | Specific personality disorders                                                                             | once                     |
| 27   | OHIP           | 301  | Personality disorders (e.g., paranoid personality, schizoid personality, obsessive compulsive personality) | frequent                 |

| Rank | Data Dimension | Code  | Description of covariate                                                                                                                          | Type of binary covariate |
|------|----------------|-------|---------------------------------------------------------------------------------------------------------------------------------------------------|--------------------------|
| 28   | ODB            |       | DIVALPROEX SODIUM                                                                                                                                 | once                     |
| 29   | ODB            |       | CARBAMAZEPINE                                                                                                                                     | frequent                 |
| 30   | OHIP           | 296   | Manic depressive psychosis, involuntal melancholia                                                                                                | once                     |
| 31   | NACRS          | Z00   | General examination and investigation of persons without complaint and reported diagnosis                                                         | once                     |
| 32   | ODB            |       | DIAZEPAM                                                                                                                                          | frequent                 |
| 33   | ODB            |       | DULOXETINE                                                                                                                                        | frequent                 |
| 34   | NACRS          | T43   | Poisoning by psychotropic drugs, not elsewhere classified                                                                                         | once                     |
| 35   | NACRS          | F14   | Mental and behavioural disorders due to use of cocaine                                                                                            | once                     |
| 36   | ODB            |       | PHENYTOIN SODIUM                                                                                                                                  | frequent                 |
| 37   | NACRS          | F19   | Mental and behavioural disorders due to multiple drug use and use of other psychoactive substances                                                | once                     |
| 38   | ODB            |       | FLUOXETINE HCL                                                                                                                                    | frequent                 |
| 39   | ODB            |       | TOPIRAMATE                                                                                                                                        | sporadic                 |
| 40   | ODB            |       | CLONIDINE HCL                                                                                                                                     | frequent                 |
| 41   | NACRS          | T42   | Poisoning by antiepileptic, sedative-hypnotic and antiparkinsonism drugs                                                                          | once                     |
| 42   | NACRS          | X61   | Intentional self-poisoning by and exposure to antiepileptic, sedative-hypnotic, antiparkinsonism and psychotropic drugs, not elsewhere classified | once                     |
| 43   | ODB            |       | OXAZEPAM                                                                                                                                          | frequent                 |
| 44   | ODB            |       | LAMOTRIGINE                                                                                                                                       | sporadic                 |
| 45   | ODB            |       | CLONAZEPAM                                                                                                                                        | sporadic                 |
| 46   | OHIP           | 301   | Personality disorders (e.g., paranoid personality, schizoid personality, obsessive compulsive personality)                                        | once                     |
| 47   | ODB            |       | TOPIRAMATE                                                                                                                                        | once                     |
| 48   | ODB            |       | OXYBUTYNIN CHLORIDE                                                                                                                               | frequent                 |
| 49   | NACRS          | 2AZ02 | Assessment, mental health                                                                                                                         | once                     |
| 50   | ODB            |       | MIRTAZAPINE                                                                                                                                       | frequent                 |
| 51   | ODB            |       | TOPIRAMATE                                                                                                                                        | frequent                 |
| 52   | NACRS          | 6AA10 | Counseling, mental health                                                                                                                         | once                     |
| 53   | NACRS          | R45   | Symptoms and signs involving emotional state                                                                                                      | once                     |
| 54   | NACRS          | 6AA02 | Assessment, mental health and addictions                                                                                                          | once                     |
| 55   | ODB            |       | BUPROPION HCL                                                                                                                                     | frequent                 |

| Rank | Data Dimension | Code | Description of covariate                                              | Type of binary covariate |
|------|----------------|------|-----------------------------------------------------------------------|--------------------------|
| 56   | ODB            |      | ESCITALOPRAM OXALATE                                                  | frequent                 |
| 57   | ODB            |      | SERTRALINE HCL                                                        | frequent                 |
| 58   | ODB            |      | CARBAMAZEPINE                                                         | sporadic                 |
| 59   | ODB            |      | CLONIDINE HCL                                                         | sporadic                 |
| 60   | ODB            |      | DOXEPIN HCL                                                           | frequent                 |
| 61   | CIHI-DAD       | U98  | Place of occurrence                                                   | once                     |
| 62   | ODB            |      | VENLAFAXINE HCL                                                       | frequent                 |
| 63   | ODB            |      | LAMOTRIGINE                                                           | once                     |
| 64   | NACRS          | R56  | Convulsions, not elsewhere classified                                 | frequent                 |
| 65   | ODB            |      | LORAZEPAM                                                             | frequent                 |
| 66   | ODB            |      | METHYLPHENIDATE HCL                                                   | frequent                 |
| 67   | ODB            |      | TEMAZEPAM                                                             | frequent                 |
| 68   | ODB            |      | DIAZEPAM                                                              | sporadic                 |
| 69   | NACRS          | X78  | Intentional self-harm by sharp object                                 | once                     |
| 70   | ODB            |      | MIRTAZAPINE                                                           | sporadic                 |
| 71   | OHIP           | 977  | Of drugs and medications - including allergy, overdose, reactions     | frequent                 |
| 72   | ODB            |      | CLONAZEPAM                                                            | once                     |
| 73   | ODB            |      | CLONIDINE HCL                                                         | once                     |
| 74   | ODB            |      | METHADONE                                                             | sporadic                 |
| 75   | ODB            |      | TRAZODONE HCL                                                         | frequent                 |
| 76   | OHIP           | 311  | Depressive or other non-psychotic disorders, not elsewhere classified | frequent                 |
| 77   | NACRS          | F32  | Depressive episode                                                    | once                     |
| 78   | ODB            |      | FLUOXETINE HCL                                                        | sporadic                 |
| 79   | ODB            |      | OXAZEPAM                                                              | sporadic                 |
| 80   | ODB            |      | METHADONE                                                             | frequent                 |
| 81   | ODB            |      | CITALOPRAM HBR                                                        | frequent                 |
| 82   | ODB            |      | DULOXETINE                                                            | sporadic                 |
| 83   | CIHI-DAD       | F32  | Depressive episode                                                    | once                     |
| 84   | ODB            |      | GABAPENTIN                                                            | sporadic                 |

| Rank  | Data Dimension | Code  | Description of covariate                                                                     | Type of binary covariate |
|-------|----------------|-------|----------------------------------------------------------------------------------------------|--------------------------|
| 85    | ODB            |       | GABAPENTIN                                                                                   | frequent                 |
| 86    | NACRS          | F11   | Mental and behavioural disorders due to use of opioids                                       | once                     |
| 87    | ODB            |       | BUPROPION HCL                                                                                | sporadic                 |
| 88    | ODB            |       | ATORVASTATIN CALCIUM                                                                         | frequent                 |
| 89    | ODB            |       | CARBAMAZEPINE                                                                                | once                     |
| 90    | ODB            |       | METHYLPHENIDATE HCL                                                                          | sporadic                 |
| 91    | OHIP           | 311   | Depressive or other non-psychotic disorders, not elsewhere classified                        | sporadic                 |
| 92    | NACRS          | F43   | Reaction to severe stress, and adjustment disorders                                          | once                     |
| 93    | OHIP           | 309   | Adjustment reaction                                                                          | frequent                 |
| 94    | ODB            |       | GABAPENTIN                                                                                   | once                     |
| 95    | OHIP           | 303   | Alcoholism                                                                                   | frequent                 |
| 96    | ODB            |       | TRAZODONE HCL                                                                                | sporadic                 |
| 97    | OHIP           | 300   | Anxiety neurosis, hysteria, neurasthenia, obsessive compulsive neurosis, reactive depression | frequent                 |
| 98    | ODB            |       | DIAZEPAM                                                                                     | once                     |
| 99    | ODB            |       | MIRTAZAPINE                                                                                  | once                     |
| 100   | ODB            |       | METHADONE                                                                                    | once                     |
| 101   | OHIP           | 304   | Drug dependence, drug addiction                                                              | sporadic                 |
| 102   | ODB            |       | Compound code not applicable (i.e. for methadone)                                            | once                     |
| 103.5 | ODB            |       | OXYCODONE HCL                                                                                | frequent                 |
| 103.5 | NACRS          | 1YT80 | Repair, skin of arm                                                                          | once                     |
| 105   | ODB            |       | PHENYTOIN SODIUM                                                                             | sporadic                 |
| 106   | ODB            |       | PHENYTOIN SODIUM                                                                             | once                     |
| 107   | OHIP           | 304   | Drug dependence, drug addiction                                                              | frequent                 |
| 108   | CIHI-DAD       | F43   | Reaction to severe stress, and adjustment disorders                                          | once                     |
| 109   | ODB            |       | OXYBUTYNIN CHLORIDE                                                                          | once                     |
| 110   | ODB            |       | VENLAFAXINE HCL                                                                              | sporadic                 |
| 111   | NACRS          | Z76   | Persons encountering health services in other circumstances                                  | once                     |
| 112   | ODB            |       | PROPRANOLOL HCL                                                                              | frequent                 |
| 113   | ODB            |       | OXYBUTYNIN CHLORIDE                                                                          | sporadic                 |

| Rank | Data Dimension | Code  | Description of covariate                                              | Type of binary covariate |
|------|----------------|-------|-----------------------------------------------------------------------|--------------------------|
| 114  | OHIP           | 306   | Psychosomatic disturbances                                            | frequent                 |
| 115  | OHIP           | 304   | Drug dependence, drug addiction                                       | once                     |
| 116  | ODB            |       | DOXEPIN HCL                                                           | sporadic                 |
| 117  | ODB            |       | ROSUVASTATIN CALCIUM                                                  | frequent                 |
| 118  | ODB            |       | SERTRALINE                                                            | frequent                 |
| 119  | ODB            |       | OXYCODONE HCL                                                         | sporadic                 |
| 120  | ODB            |       | ESCITALOPRAM OXALATE                                                  | sporadic                 |
| 121  | ODB            |       | ALPRAZOLAM                                                            | frequent                 |
| 122  | ODB            |       | PAROXETINE HCL                                                        | frequent                 |
| 123  | ODB            |       | SENNA                                                                 | frequent                 |
| 124  | ODB            |       | PROPRANOLOL HCL                                                       | sporadic                 |
| 125  | NACRS          | F10   | Mental and behavioural disorders due to use of alcohol                | once                     |
| 126  | ODB            |       | MORPHINE SULFATE                                                      | frequent                 |
| 127  | OHIP           | 303   | Alcoholism                                                            | once                     |
| 128  | ODB            |       | OXAZEPAM                                                              | once                     |
| 129  | ODB            |       | TRAZODONE HCL                                                         | once                     |
| 130  | ODB            |       | FLUOXETINE HCL                                                        | once                     |
| 131  | NACRS          | 1PM52 | Drainage, bladder NEC                                                 | once                     |
| 132  | ODB            |       | DULOXETINE                                                            | once                     |
| 133  | ODB            |       | SERTRALINE HCL                                                        | sporadic                 |
| 134  | ODB            |       | PROCHLORPERAZINE MALEATE                                              | frequent                 |
| 135  | ODB            |       | ALPRAZOLAM                                                            | sporadic                 |
| 136  | OHIP           | 311   | Depressive or other non-psychotic disorders, not elsewhere classified | once                     |
| 137  | NACRS          | R56   | Convulsions, not elsewhere classified                                 | once                     |
| 138  | ODB            |       | BUPROPION HCL                                                         | once                     |
| 139  | NACRS          | T39   | Poisoning by nonopioid analgesics, antipyretics and antirheumatics    | once                     |
| 140  | NACRS          | Z04   | Examination and observation for other reasons                         | once                     |
| 141  | ODB            |       | HYDROMORPHONE HCL                                                     | once                     |
| 142  | NACRS          | Z72   | Problems related to lifestyle                                         | once                     |

| Rank | Data Dimension | Code | Description of covariate                                                                     | Type of binary covariate |
|------|----------------|------|----------------------------------------------------------------------------------------------|--------------------------|
| 143  | ODB            |      | CITALOPRAM HBR                                                                               | sporadic                 |
| 144  | ODB            |      | OMEPRAZOLE                                                                                   | frequent                 |
| 145  | ODB            |      | LORAZEPAM                                                                                    | once                     |
| 146  | NACRS          | Z63  | Other problems related to primary support group, including family circumstances              | once                     |
| 147  | ODB            |      | METHYLPHENIDATE HCL                                                                          | once                     |
| 148  | NACRS          | F41  | Other anxiety disorders                                                                      | once                     |
| 149  | NACRS          | E14  | Unspecified diabetes mellitus                                                                | frequent                 |
| 150  | ODB            |      | PAROXETINE HCL                                                                               | sporadic                 |
| 151  | ODB            |      | HYDROMORPHONE HCL                                                                            | frequent                 |
| 152  | OHIP           | 309  | Adjustment reaction                                                                          | once                     |
| 153  | ODB            |      | ESCITALOPRAM OXALATE                                                                         | once                     |
| 154  | ODB            |      | ATORVASTATIN CALCIUM                                                                         | sporadic                 |
| 155  | ODB            |      | SERTRALINE HCL                                                                               | once                     |
| 156  | ODB            |      | SERTRALINE                                                                                   | sporadic                 |
| 157  | ODB            |      | PANTOPRAZOLE SODIUM                                                                          | frequent                 |
| 158  | ODB            |      | NORTRIPTYLINE HCL                                                                            | frequent                 |
| 159  | OHIP           | 300  | Anxiety neurosis, hysteria, neurasthenia, obsessive compulsive neurosis, reactive depression | sporadic                 |
| 160  | ODB            |      | RABEPRAZOLE SODIUM                                                                           | frequent                 |
| 161  | OHIP           | 977  | Of drugs and medications - including allergy, overdose, reactions                            | once                     |
| 162  | ODB            |      | TEMAZEPAM                                                                                    | once                     |
| 163  | ODB            |      | AMITRIPTYLINE HCL                                                                            | frequent                 |
| 164  | ODB            |      | OXYCODONE HCL                                                                                | once                     |
| 165  | ODB            |      | PROPRANOLOL HCL                                                                              | once                     |
| 166  | NACRS          | Z03  | Medical observation and evaluation for suspected diseases and conditions                     | once                     |
| 167  | ODB            |      | VENLAFAXINE HCL                                                                              | once                     |
| 168  | ODB            |      | LANSOPRAZOLE                                                                                 | frequent                 |
| 169  | ODB            |      | DOMPERIDONE                                                                                  | frequent                 |
| 170  | OHIP           | 345  | Epilepsy                                                                                     | frequent                 |
| 171  | ODB            |      | CELECOXIB                                                                                    | frequent                 |

| Rank | Data Dimension | Code  | Description of covariate                                                                     | Type of binary covariate |
|------|----------------|-------|----------------------------------------------------------------------------------------------|--------------------------|
| 172  | ODB            |       | BENZOYL PEROXIDE                                                                             | frequent                 |
| 173  | NACRS          | R52   | Pain, not elsewhere classified                                                               | once                     |
| 174  | ODB            |       | SENNA                                                                                        | once                     |
| 175  | ODB            |       | OMEPRAZOLE                                                                                   | sporadic                 |
| 176  | NACRS          | 2ZZ13 | Specimen collection (for diagnostic testing), total body                                     | frequent                 |
| 177  | ODB            |       | SERTRALINE                                                                                   | once                     |
| 178  | NACRS          | S06   | Intracranial injury                                                                          | once                     |
| 179  | NACRS          | X58   | Exposure to other specified factors                                                          | once                     |
| 180  | ODB            |       | EPINEPHRINE HCL                                                                              | once                     |
| 181  | ODB            |       | FAMOTIDINE                                                                                   | frequent                 |
| 182  | ODB            |       | ROSUVASTATIN CALCIUM                                                                         | sporadic                 |
| 183  | NACRS          | U98   | Place of occurrence for external injury (e.g. school, arena)                                 | frequent                 |
| 184  | NACRS          | Y07   | Other maltreatment syndromes                                                                 | once                     |
| 185  | ODB            |       | CITALOPRAM HBR                                                                               | once                     |
| 186  | ODB            |       | FLUTICASONE PROPIONATE & SALMETEROL XINAFOATE                                                | frequent                 |
| 187  | OHIP           | 305   | Tobacco abuse                                                                                | frequent                 |
| 188  | ODB            |       | RANITIDINE HCL                                                                               | frequent                 |
| 189  | OHIP           | 313   | Behaviour disorders of childhood and adolescence                                             | once                     |
| 190  | OHIP           | 592   | Stone in kidney or ureter                                                                    | frequent                 |
| 191  | OHIP           | 70    | Viral hepatitis                                                                              | once                     |
| 192  | OHIP           | 300   | Anxiety neurosis, hysteria, neurasthenia, obsessive compulsive neurosis, reactive depression | once                     |
| 193  | NACRS          | R25   | Abnormal involuntary movements                                                               | once                     |
| 194  | ODB            |       | RAMIPRIL                                                                                     | frequent                 |
| 195  | OHIP           | 306   | Psychosomatic disturbances                                                                   | once                     |
| 196  | ODB            |       | DOCUSATE                                                                                     | once                     |
| 197  | NACRS          | W45   | Foreign body or object entering through skin                                                 | once                     |
| 198  | NACRS          | Y04   | Assault by bodily force                                                                      | once                     |
| 199  | ODB            |       | DOXEPIN HCL                                                                                  | once                     |
| 200  | ODB            |       | MORPHINE SULFATE                                                                             | once                     |

| Rank  | Data Dimension | Code  | Description of covariate                                                                                        | Type of binary covariate |
|-------|----------------|-------|-----------------------------------------------------------------------------------------------------------------|--------------------------|
| 201   | OHIP           | 313   | Behaviour disorders of childhood and adolescence                                                                | frequent                 |
| 202   | NACRS          | R53   | Malaise and fatigue                                                                                             | once                     |
| 203.5 | ODB            |       | PANTOPRAZOLE SODIUM                                                                                             | sporadic                 |
| 203.5 | NACRS          | L02   | Cutaneous abscess, furuncle and carbuncle                                                                       | once                     |
| 205   | ODB            |       | TRETINOIN                                                                                                       | frequent                 |
| 206   | NACRS          | 3PS10 | Xray, kidney with ureter and bladder                                                                            | once                     |
| 207   | ODB            |       | ALPRAZOLAM                                                                                                      | once                     |
| 208   | ODB            |       | ALBUTEROL                                                                                                       | frequent                 |
| 209   | ODB            |       | IBUPROFEN                                                                                                       | frequent                 |
| 210   | ODB            |       | DOMPERIDONE MALEATE                                                                                             | frequent                 |
| 211   | ODB            |       | NORTRIPTYLINE HCL                                                                                               | once                     |
| 212   | ODB            |       | ACETAMINOPHEN & OXYCODONE HCL                                                                                   | frequent                 |
| 213   | ODB            |       | PROCHLORPERAZINE MALEATE                                                                                        | once                     |
| 214   | OHIP           | 349   | Other diseases of central nervous system (e.g., brain abscess, narcolepsy, motor neuron disease, syringomyelia) | frequent                 |
| 215   | NACRS          | L03   | Cellulitis                                                                                                      | frequent                 |
| 216   | NACRS          | 3AN20 | Computerized tomography [CT], brain                                                                             | once                     |
| 217   | NACRS          | E14   | Unspecified diabetes mellitus                                                                                   | once                     |
| 218   | OHIP           | 314   | Hyperkinetic syndrome of childhood                                                                              | once                     |
| 219   | ODB            |       | HYDROCHLOROTHIAZIDE                                                                                             | frequent                 |
| 220.5 | OHIP           | 136   | Other infectious or parasitic diseases                                                                          | frequent                 |
| 220.5 | OHIP           | 451   | Phlebitis, thrombophlebitis                                                                                     | frequent                 |
| 222   | OHIP           | 314   | Hyperkinetic syndrome of childhood                                                                              | frequent                 |
| 223   | NACRS          | L03   | Cellulitis                                                                                                      | once                     |
| 224   | ODB            |       | LACTULOSE                                                                                                       | once                     |
| 225   | ODB            |       | FLUTICASONE PROPIONATE                                                                                          | frequent                 |
| 226   | NACRS          | W18   | Other fall on same level                                                                                        | once                     |
| 227   | ODB            |       | BACLOFEN                                                                                                        | frequent                 |
| 228   | OHIP           | 345   | Epilepsy                                                                                                        | sporadic                 |

| Rank  | Data Dimension | Code  | Description of covariate                                                                               | Type of binary covariate |
|-------|----------------|-------|--------------------------------------------------------------------------------------------------------|--------------------------|
| 229   | OHIP           | 592   | Stone in kidney or ureter                                                                              | once                     |
| 230   | ODB            |       | METOCLOPRAMIDE HCL                                                                                     | once                     |
| 231   | OHIP           | 909   | Other problems of social adjustment                                                                    | frequent                 |
| 232   | ODB            |       | INSULIN ASPART RECOMBINANT                                                                             | frequent                 |
| 233   | ODB            |       | PAROXETINE HCL                                                                                         | once                     |
| 234   | NACRS          | T88   | Other complications of surgical and medical care, not elsewhere classified                             | once                     |
| 235   | ODB            |       | LEVOTHYROXINE SODIUM                                                                                   | frequent                 |
| 236   | NACRS          | Z71   | Persons encountering health services for other counseling and medical advice, not elsewhere classified | once                     |
| 237   | OHIP           | 70    | Viral hepatitis                                                                                        | frequent                 |
| 238   | OHIP           | 592   | Stone in kidney or ureter                                                                              | sporadic                 |
| 239   | ODB            |       | ALBUTEROL                                                                                              | once                     |
| 240   | NACRS          | T31   | Burns classified according to extent of body surface involved                                          | once                     |
| 241   | ODB            |       | OMEPRAZOLE                                                                                             | once                     |
| 242   | OHIP           | 949   | Burns - thermal or chemical                                                                            | frequent                 |
| 243   | ODB            |       | FLUTICASONE PROPIONATE & SALMETEROL XINAFOATE                                                          | sporadic                 |
| 244   | ODB            |       | FUROSEMIDE                                                                                             | once                     |
| 245   | NACRS          | E11   | Type 2 Diabetes mellitus                                                                               | frequent                 |
| 246   | NACRS          | 3ER20 | Computerized tomography [CT], head NEC                                                                 | once                     |
| 247   | NACRS          | N89   | Other noninflammatory disorders of vagina                                                              | once                     |
| 248   | NACRS          | S60   | Superficial injury of wrist and hand                                                                   | once                     |
| 249   | OHIP           | 345   | Epilepsy                                                                                               | once                     |
| 250.5 | NACRS          | W49   | Exposure to other and unspecified inanimate mechanical forces                                          | once                     |
| 250.5 | NACRS          | 3VA10 | Xray, hip joint                                                                                        | once                     |
| 252   | OHIP           | 641   | Abruptio placentae, placenta praevia                                                                   | frequent                 |
| 253   | NACRS          | L02   | Cutaneous abscess, furuncle and carbuncle                                                              | frequent                 |
| 254   | ODB            |       | BENZOYL PEROXIDE & CLINDAMYCIN                                                                         | frequent                 |
| 255   | NACRS          | U99   | Activity during external injury                                                                        | once                     |
| 256   | OHIP           | 884   | Lacerations, open wounds, traumatic amputations - upper limb(s)                                        | sporadic                 |
| 257   | ODB            |       | METFORMIN                                                                                              | frequent                 |

| Rank | Data Dimension | Code  | Description of covariate                                                                      | Type of binary covariate |
|------|----------------|-------|-----------------------------------------------------------------------------------------------|--------------------------|
| 258  | NACRS          | S61   | Open wound of wrist and hand                                                                  | once                     |
| 259  | ODB            |       | FOLIC ACID                                                                                    | frequent                 |
| 260  | ODB            |       | DOCUSATE SODIUM                                                                               | once                     |
| 261  | ODB            |       | LANSOPRAZOLE                                                                                  | once                     |
| 262  | NACRS          | W25   | Contact with sharp glass                                                                      | once                     |
| 263  | ODB            |       | LEVOFLOXACIN                                                                                  | once                     |
| 264  | OHIP           | 816   | Phalanges - foot or hand                                                                      | sporadic                 |
| 265  | NACRS          | 2ZZ13 | Specimen collection (for diagnostic testing), total body                                      | once                     |
| 266  | NACRS          | 2HZ24 | Electrophysiological measurement, heart                                                       | once                     |
| 267  | NACRS          | S89   | Other and unspecified injuries of lower leg                                                   | once                     |
| 268  | NACRS          | S02   | Fracture of skull and facial bones                                                            | once                     |
| 269  | CIHI-DAD       | R10   | Abdominal and pelvic pain                                                                     | once                     |
| 270  | ODB            |       | ATORVASTATIN CALCIUM                                                                          | once                     |
| 271  | CIHI-DAD       | O00   | Ectopic pregnancy                                                                             | once                     |
| 272  | OHIP           | 884   | Lacerations, open wounds, traumatic amputations - upper limb(s)                               | once                     |
| 273  | NACRS          | T14   | Injury of unspecified body region                                                             | once                     |
| 274  | ODB            |       | METFORMIN HCL                                                                                 | frequent                 |
| 275  | OHIP           | 521   | Dental caries, other diseases of hard tissues of teeth (system inserted for dentists' claims) | frequent                 |
| 276  | ODB            |       | PANTOPRAZOLE SODIUM                                                                           | once                     |
| 277  | OHIP           | 682   | Cellulitis, abscess                                                                           | frequent                 |
| 278  | OHIP           | 313   | Behaviour disorders of childhood and adolescence                                              | sporadic                 |
| 279  | NACRS          | Z48   | Other surgical follow-up care                                                                 | once                     |
| 280  | ODB            |       | GLYBURIDE                                                                                     | sporadic                 |
| 281  | NACRS          | 1ZZ35 | Pharmacotherapy, total body                                                                   | frequent                 |
| 282  | ODB            |       | FLUTICASONE PROPIONATE & SALMETEROL XINAFOATE                                                 | once                     |
| 283  | NACRS          | W50   | Hit, struck, kicked, twisted, bitten or scratched by another person                           | once                     |
| 284  | OHIP           | 930   | Foreign body in eye, or other tissues                                                         | frequent                 |
| 285  | NACRS          | A09   | Diarrhoea and gastroenteritis of presumed infectious origin                                   | once                     |
| 286  | ODB            |       | BENZOYL PEROXIDE & CLINDAMYCIN PHOSPHATE                                                      | frequent                 |

| Rank | Data Dimension | Code  | Description of covariate                                     | Type of binary covariate |
|------|----------------|-------|--------------------------------------------------------------|--------------------------|
| 287  | NACRS          | E10   | Type 1 Diabetes mellitus                                     | frequent                 |
| 288  | ODB            |       | AMLODIPINE BESYLATE                                          | frequent                 |
| 289  | NACRS          | K59   | Other functional intestinal disorders                        | once                     |
| 290  | NACRS          | T00   | Superficial injuries involving multiple body regions         | once                     |
| 291  | NACRS          | L08   | Other local infections of skin and subcutaneous tissue       | once                     |
| 292  | OHIP           | 879   | Lacerations, open wounds - except limbs                      | sporadic                 |
| 293  | NACRS          | Z51   | Other medical care                                           | frequent                 |
| 294  | ODB            |       | ALBUTEROL SULFATE                                            | frequent                 |
| 295  | OHIP           | 305   | Tobacco abuse                                                | once                     |
| 296  | OHIP           | 816   | Phalanges - foot or hand                                     | once                     |
| 297  | ODB            |       | MUPIROCIN                                                    | once                     |
| 298  | NACRS          | U98   | Place of occurrence for external injury (e.g. school, arena) | once                     |
| 299  | NACRS          | J20   | Acute bronchitis                                             | once                     |
| 300  | ODB            |       | RABEPRAZOLE SODIUM                                           | once                     |
| 301  | ODB            |       | FUROSEMIDE                                                   | frequent                 |
| 302  | CIHI-DAD       | O99   | Complications of anaesthesia during the puerperium           | once                     |
| 303  | ODB            |       | DICLOFENAC SODIUM & MISOPROSTOL                              | frequent                 |
| 304  | OHIP           | 136   | Other infectious or parasitic diseases                       | once                     |
| 305  | ODB            |       | CYANOCOBALAMIN                                               | once                     |
| 306  | NACRS          | S99   | Other and unspecified injuries of ankle and foot             | once                     |
| 307  | NACRS          | K02   | Dental caries                                                | once                     |
| 308  | ODB            |       | FOLIC ACID                                                   | sporadic                 |
| 309  | ODB            |       | BISACODYL                                                    | once                     |
| 310  | NACRS          | 8TA70 | Immunization (to prevent) tetanus                            | once                     |
| 311  | NACRS          | S20   | Superficial injury of thorax                                 | once                     |
| 312  | OHIP           | 564   | Spastic colon, irritable colon, mucous colitis, constipation | frequent                 |
| 313  | NACRS          | G43   | Migraine                                                     | once                     |
| 314  | NACRS          | X59   | Exposure to unspecified factor                               | once                     |
| 315  | ODB            |       | INSULIN ASPART RECOMBINANT                                   | sporadic                 |

| Rank  | Data Dimension | Code  | Description of covariate                                                                                                                                                                  | Type of binary covariate |
|-------|----------------|-------|-------------------------------------------------------------------------------------------------------------------------------------------------------------------------------------------|--------------------------|
| 316.5 | OHIP           | 340   | Multiple sclerosis                                                                                                                                                                        | frequent                 |
| 316.5 | OHIP           | 703   | Ingrown nail, onychogryposis                                                                                                                                                              | frequent                 |
| 318   | ODB            |       | MELOXICAM                                                                                                                                                                                 | frequent                 |
| 319   | ODB            |       | AMITRIPTYLINE HCL                                                                                                                                                                         | once                     |
| 320   | OHIP           | 686   | Pyoderma, pyogenic granuloma, other local infections                                                                                                                                      | once                     |
| 321   | ODB            |       | PSYLLIUM                                                                                                                                                                                  | frequent                 |
| 322   | NACRS          | S00   | Superficial injury of head                                                                                                                                                                | once                     |
| 323   | OHIP           | 349   | Other diseases of central nervous system (e.g., brain abscess, narcolepsy, motor neuron disease, syringomyelia)                                                                           | once                     |
| 324   | NACRS          | G44   | Other headache syndromes                                                                                                                                                                  | once                     |
| 325   | ODB            |       | INDOMETHACIN                                                                                                                                                                              | once                     |
| 326   | NACRS          | 3UL10 | Xray, joints of fingers and hand NEC                                                                                                                                                      | once                     |
| 327   | CIHI-DAD       | Y83   | Surgical operation and other surgical procedures as the cause of abnormal reaction of the patient, or of later complication, without mention of misadventure at the time of the procedure | once                     |
| 328.5 | ODB            |       | RAMIPRIL                                                                                                                                                                                  | sporadic                 |
| 328.5 | CIHI-DAD       | 5CA93 | Surgical removal of extrauterine pregnancy                                                                                                                                                | once                     |
| 330   | OHIP           | 370   | Keratitis, corneal ulcer                                                                                                                                                                  | frequent                 |
| 331   | ODB            |       | CLINDAMYCIN HCL                                                                                                                                                                           | once                     |
| 332   | OHIP           | 530   | Esophagitis, cardiospasm, ulcer of esophagus; stricture, stenosis, or obstruction of esophagus                                                                                            | once                     |
| 333   | OHIP           | 854   | Other head injuries                                                                                                                                                                       | once                     |
| 334   | CIHI-DAD       | 3OT20 | Computerized tomography [CT], abdominal cavity                                                                                                                                            | once                     |
| 335   | NACRS          | N76   | Other inflammation of vagina and vulva                                                                                                                                                    | once                     |
| 336   | NACRS          | S33   | Dislocation, sprain and strain of joints and ligaments of lumbar spine and pelvis                                                                                                         | once                     |
| 337   | NACRS          | S39   | Other and unspecified injuries of abdomen, lower back and pelvis                                                                                                                          | once                     |
| 338   | NACRS          | S09   | Other and unspecified injuries of head                                                                                                                                                    | once                     |
| 339   | ODB            |       | BACLOFEN                                                                                                                                                                                  | once                     |
| 340   | NACRS          | 3TM10 | Xray, elbow joint                                                                                                                                                                         | once                     |
| 341   | OHIP           | 346   | Migraine                                                                                                                                                                                  | frequent                 |
| 342   | NACRS          | 3OT10 | Xray, abdominal cavity                                                                                                                                                                    | once                     |

| Rank | Data Dimension | Code | Description of covariate                                                            | Type of binary covariate |
|------|----------------|------|-------------------------------------------------------------------------------------|--------------------------|
| 343  | ODB            |      | LEVOTHYROXINE SODIUM                                                                | sporadic                 |
| 344  | NACRS          | N91  | Absent, scanty and rare menstruation                                                | once                     |
| 345  | NACRS          | L30  | Other dermatitis                                                                    | once                     |
| 346  | ODB            |      | DEXAMETHASONE & FRAMYCETIN SULFATE & GRAMICIDIN                                     | once                     |
| 347  | OHIP           | 555  | Regional enteritis, Crohn's disease                                                 | once                     |
| 348  | NACRS          | R42  | Dizziness and giddiness                                                             | once                     |
| 349  | NACRS          | Z09  | Follow-up examination after treatment for conditions other than malignant neoplasms | once                     |
| 350  | NACRS          | B37  | Candidiasis                                                                         | once                     |
| 351  | OHIP           | 565  | Anal fissure, anal fistula                                                          | once                     |
| 352  | ODB            |      | DOMPERIDONE                                                                         | once                     |
| 353  | ODB            |      | ACETAMINOPHEN & OXYCODONE HCL                                                       | once                     |
| 354  | NACRS          | S50  | Superficial injury of forearm                                                       | once                     |
| 355  | NACRS          | K62  | Other diseases of anus and rectum                                                   | once                     |
| 356  | NACRS          | E11  | Type 2 Diabetes mellitus                                                            | once                     |
| 357  | ODB            |      | BENZOYL PEROXIDE & CLINDAMYCIN PHOSPHATE                                            | once                     |
| 358  | OHIP           | 658  | Premature rupture of membrane                                                       | frequent                 |
| 359  | ODB            |      | HYDROCHLOROTHIAZIDE                                                                 | once                     |
| 360  | CIHI-DAD       | O63  | Long labour                                                                         | once                     |
| 361  | ODB            |      | FLUTICASONE PROPIONATE                                                              | once                     |
| 362  | ODB            |      | CELECOXIB                                                                           | once                     |
| 363  | OHIP           | 879  | Lacerations, open wounds - except limbs                                             | once                     |
| 364  | ODB            |      | BUDESONIDE & FORMOTEROL FUMARATE                                                    | once                     |
| 365  | OHIP           | 989  | Of other chemicals (e.g., lead, pesticides, and venomous bites)                     | once                     |
| 366  | NACRS          | R00  | Abnormalities of heart beat                                                         | once                     |
| 367  | NACRS          | M79  | Other soft tissue disorders, not elsewhere classified                               | once                     |
| 368  | OHIP           | 615  | Acute or chronic endometritis                                                       | once                     |
| 369  | OHIP           | 10   | Primary tuberculous infection, including recent positive TB skin test conversion    | frequent                 |
| 370  | OHIP           | 240  | Simple thyroid goitre                                                               | once                     |
| 371  | OHIP           | 340  | Multiple sclerosis                                                                  | once                     |

| Rank  | Data Dimension | Code  | Description of covariate                                                              | Type of binary covariate |
|-------|----------------|-------|---------------------------------------------------------------------------------------|--------------------------|
| 372   | OHIP           | 842   | Wrist, hand, fingers                                                                  | frequent                 |
| 373   | ODB            |       | DESONIDE                                                                              | once                     |
| 374   | OHIP           | 611   | Breast abscess, gynaecomastia, hypertrophy, other disorders of breast                 | frequent                 |
| 375   | NACRS          | 1YU80 | Repair, skin of hand                                                                  | once                     |
| 376   | OHIP           | 615   | Acute or chronic endometritis                                                         | sporadic                 |
| 377   | OHIP           | 532   | Duodenal ulcer, with or without haemorrhage or perforation                            | once                     |
| 378   | ODB            |       | ATENOLOL                                                                              | once                     |
| 379   | NACRS          | O21   | Excessive vomiting in pregnancy                                                       | once                     |
| 380   | ODB            |       | PSYLLIUM                                                                              | once                     |
| 381   | OHIP           | 289   | Other diseases of blood, marrow, spleen                                               | frequent                 |
| 382   | ODB            |       | FUROSEMIDE                                                                            | sporadic                 |
| 383   | OHIP           | 909   | Other problems of social adjustment                                                   | once                     |
| 384.5 | ODB            |       | BENZALKONIUM & DEXAMETHASONE & TOBRAMYCIN                                             | once                     |
| 384.5 | OHIP           | 698   | Pruritus ani, other itchy conditions                                                  | once                     |
| 386   | OHIP           | 729   | Fibrositis, myositis, muscular rheumatism                                             | once                     |
| 387   | NACRS          | H57   | Other disorders of eye and adnexa                                                     | once                     |
| 388   | ODB            |       | MOXIFLOXACIN HCL                                                                      | once                     |
| 389   | ODB            |       | DICLOFENAC SODIUM                                                                     | once                     |
| 390   | ODB            |       | MOMETASONE FUROATE                                                                    | frequent                 |
| 391   | ODB            |       | BUDESONIDE                                                                            | frequent                 |
| 392   | NACRS          | S91   | Open wound of ankle and foot                                                          | once                     |
| 393   | NACRS          | W01   | Fall on same level from slipping, tripping and stumbling                              | once                     |
| 394   | ODB            |       | METFORMIN                                                                             | once                     |
| 395   | NACRS          | 5AB06 | Fetal biometric qualitative evaluation                                                | frequent                 |
| 396   | OHIP           | 695   | Erythema multiforme, erythema nodosum, acne, rosacea, lupus erythematosus, intertrigo | once                     |
| 397   | NACRS          | 3EQ10 | Xray, soft tissue of head and neck                                                    | once                     |
| 398   | CIHI-DAD       | 1OD89 | Excision total, gallbladder                                                           | once                     |
| 399   | NACRS          | 3UZ10 | Xray, hand with wrist                                                                 | once                     |
| 400.5 | ODB            |       | ROSUVASTATIN CALCIUM                                                                  | once                     |

| Rank  | Data Dimension | Code  | Description of covariate                                                                      | Type of binary covariate |
|-------|----------------|-------|-----------------------------------------------------------------------------------------------|--------------------------|
| 400.5 | CIHI-DAD       | 5MD53 | Forceps traction and rotation delivery                                                        | once                     |
| 402   | NACRS          | N77   | Vulvovaginal ulceration and inflammation in diseases classified elsewhere                     | once                     |
| 403   | CIHI-DAD       | 1NV89 | Excision total, appendix                                                                      | once                     |
| 404   | OHIP           | 280   | Iron deficiency anaemia                                                                       | once                     |
| 405   | OHIP           | 521   | Dental caries, other diseases of hard tissues of teeth (system inserted for dentists' claims) | once                     |
| 406   | OHIP           | 256   | Ovarian dysfunction (e.g., ovarian failure, polycystic ovaries, Stein-Leventhal syndrome)     | once                     |
| 407   | ODB            |       | METAPROTERENOL SULFATE                                                                        | once                     |
| 408   | NACRS          | 3RZ30 | Ultrasound, female genital tract NEC                                                          | once                     |
| 409   | ODB            |       | IRON FERROUS GLUCONATE                                                                        | frequent                 |
| 410   | ODB            |       | HYDROCHLOROTHIAZIDE                                                                           | sporadic                 |
| 411   | CIHI-DAD       | O13   | Gestational [pregnancy-induced] hypertension without significant proteinuria                  | once                     |
| 412   | OHIP           | 919   | Abrasions, bruises, contusions and other superficial injury including non-venomous bites      | once                     |
| 413   | NACRS          | 3WA10 | Xray, ankle joint                                                                             | once                     |
| 414   | ODB            |       | RANITIDINE HCL                                                                                | once                     |
| 415   | ODB            |       | NIZATIDINE                                                                                    | once                     |
| 416   | OHIP           | 683   | Acute lymphadenitis                                                                           | once                     |
| 417   | ODB            |       | DICLOFENAC SODIUM & MISOPROSTOL                                                               | once                     |
| 418   | OHIP           | 474   | Hypertrophy or chronic infection of tonsils and/or adenoids                                   | sporadic                 |
| 419   | OHIP           | 685   | Pilonidal cyst or abscess                                                                     | frequent                 |
| 420   | ODB            |       | BUDESONIDE & FORMOTEROL FUMARATE                                                              | frequent                 |
| 421   | NACRS          | M25   | Other joint disorders, not elsewhere classified                                               | once                     |
| 422   | OHIP           | 277   | Other metabolic disorders                                                                     | once                     |
| 423   | OHIP           | 540   | Acute appendicitis, with or without abscess or peritonitis                                    | sporadic                 |
| 424   | NACRS          | M54   | Dorsalgia                                                                                     | once                     |
| 425   | OHIP           | 280   | Iron deficiency anaemia                                                                       | frequent                 |
| 426   | ODB            |       | WARFARIN SODIUM                                                                               | once                     |
| 427   | NACRS          | S93   | Dislocation, sprain and strain of joints and ligaments at ankle and foot level                | once                     |
| 428   | OHIP           | 540   | Acute appendicitis, with or without abscess or peritonitis                                    | once                     |
| 429   | OHIP           | 633   | Ectopic pregnancy                                                                             | sporadic                 |

| Rank  | Data Dimension | Code  | Description of covariate                                                                                                                                                                                      | Type of binary covariate |
|-------|----------------|-------|---------------------------------------------------------------------------------------------------------------------------------------------------------------------------------------------------------------|--------------------------|
| 430   | ODB            |       | MEPERIDINE HCL                                                                                                                                                                                                | frequent                 |
| 431   | NACRS          | 3SC10 | Xray, spinal vertebrae                                                                                                                                                                                        | once                     |
| 432   | ODB            |       | IBUPROFEN                                                                                                                                                                                                     | once                     |
| 433   | OHIP           | 718   | Joint derangement, recurrent dislocation, ankylosis, meniscus or cartilage tear, loose body in joint                                                                                                          | once                     |
| 434   | OHIP           | 496   | Other chronic obstructive pulmonary disease                                                                                                                                                                   | once                     |
| 435   | OHIP           | 575   | Cholecystitis, without gall stones                                                                                                                                                                            | once                     |
| 436   | OHIP           | 340   | Multiple sclerosis                                                                                                                                                                                            | sporadic                 |
| 437   | OHIP           | 999   | WITHOUT DIAGNOSIS                                                                                                                                                                                             | frequent                 |
| 438   | NACRS          | S01   | Open wound of head                                                                                                                                                                                            | once                     |
| 439   | OHIP           | 451   | Phlebitis, thrombophlebitis                                                                                                                                                                                   | once                     |
| 440   | OHIP           | 949   | Burns - thermal or chemical                                                                                                                                                                                   | once                     |
| 441   | NACRS          | R55   | Syncope and collapse                                                                                                                                                                                          | once                     |
| 442   | NACRS          | K08   | Other disorders of teeth and supporting structures                                                                                                                                                            | once                     |
| 443   | NACRS          | 1WA03 | Immobilization, ankle joint                                                                                                                                                                                   | once                     |
| 444   | ODB            |       | ALBUTEROL SULFATE                                                                                                                                                                                             | once                     |
| 445   | OHIP           | 610   | Cystic mastitis, chronic cystic disease, breast cyst, fibro-adenosis of breast                                                                                                                                | frequent                 |
| 446   | OHIP           | 242   | Hyperthyroidism, thyrotoxicosis, exophthalmic goitre                                                                                                                                                          | frequent                 |
| 447   | NACRS          | B96   | Other bacterial agents as the cause of diseases classified to other chapters                                                                                                                                  | once                     |
| 448   | NACRS          | J40   | Bronchitis, not specified as acute or chronic                                                                                                                                                                 | once                     |
| 449.5 | NACRS          | J98   | Other respiratory disorders                                                                                                                                                                                   | once                     |
| 449.5 | OHIP           | 680   | Boil, carbuncle, furunculosis                                                                                                                                                                                 | frequent                 |
| 451   | OHIP           | 635   | Therapeutic abortion                                                                                                                                                                                          | sporadic                 |
| 452   | OHIP           | 307   | Habit spasms, tics, stuttering, tension headaches, anorexia nervosa, sleep disorders, enuresis                                                                                                                | frequent                 |
| 453   | NACRS          | K04   | Diseases of pulp and periapical tissues                                                                                                                                                                       | once                     |
| 454   | OHIP           | 100   | Diagnostic code 100 is for internal use only and should be used when it is requested that the service or diagnosis on the incoming claim be suppressed from verification. The usage of the code is monitored. | once                     |
| 455   | OHIP           | 519   | Other diseases of respiratory system                                                                                                                                                                          | frequent                 |
| 456   | NACRS          | N94   | Pain and other conditions associated with female genital organs and menstrual cycle                                                                                                                           | once                     |
| 457   | NACRS          | 3GY10 | Xray, thoracic cavity NEC                                                                                                                                                                                     | once                     |

| Rank  | Data Dimension | Code  | Description of covariate                                                          | Type of binary covariate |
|-------|----------------|-------|-----------------------------------------------------------------------------------|--------------------------|
| 458   | CIHI-DAD       | 5PC91 | Interventions to uterus (following delivery)                                      | once                     |
| 459.5 | OHIP           | 729   | Fibrositis, myositis, muscular rheumatism                                         | frequent                 |
| 459.5 | OHIP           | 829   | Other fractures                                                                   | sporadic                 |
| 461   | NACRS          | R11   | Nausea and vomiting                                                               | once                     |
| 462   | OHIP           | 704   | Alopecia                                                                          | frequent                 |
| 463   | OHIP           | 642   | Pre-eclampsia, eclampsia, toxemia                                                 | sporadic                 |
| 464   | NACRS          | R21   | Rash and other nonspecific skin eruption                                          | once                     |
| 465   | ODB            |       | CEFUROXIME AXETIL                                                                 | once                     |
| 466   | OHIP           | 277   | Other metabolic disorders                                                         | frequent                 |
| 467   | OHIP           | 899   | Parent-child problems (e.g., child-abuse, battered child, child neglect)          | once                     |
| 468   | OHIP           | 281   | Pernicious anaemia                                                                | frequent                 |
| 469   | OHIP           | 696   | Psoriasis                                                                         | frequent                 |
| 470   | ODB            |       |                                                                                   | frequent                 |
| 471   | NACRS          | Z51   | ACETAMINOPHEN & CAFFEINE & CODEINE PHOSPHATE                                      | once                     |
| 472   | NACRS          | 1ZZ35 | Pharmacotherapy, total body                                                       | once                     |
| 473   | NACRS          | O26   | Maternal care for other conditions predominantly related to pregnancy             | once                     |
| 474   | ODB            |       | DOXYLAMINE SUCCINATE & PYRIDOXINE HCL                                             | frequent                 |
| 475   | CIHI-DAD       | 5PC80 | Surgical repair, postpartum                                                       | once                     |
| 476   | NACRS          | S90   | Superficial injury of ankle and foot                                              | once                     |
| 477   | OHIP           | 272   | Disorders of lipid metabolism (e.g., hypercholesterolemia, lipoprotein disorders) | once                     |
| 478   | OHIP           | 959   | Other injuries or trauma                                                          | frequent                 |
| 479   | OHIP           | 635   | Therapeutic abortion                                                              | once                     |
| 480   | OHIP           | 680   | Boil, carbuncle, furunculosis                                                     | once                     |
| 481   | ODB            |       | ETHINYLESTRADIOL & NORGESTREL                                                     | frequent                 |
| 482   | OHIP           | 635   | Therapeutic abortion                                                              | frequent                 |
| 483   | NACRS          | S05   | Injury of eye and orbit                                                           | once                     |
| 484   | OHIP           | 574   | Cholelithiasis (gall stones) with or without cholecystitis                        | sporadic                 |
| 485   | OHIP           | 847   | Neck, low back, coccyx                                                            | frequent                 |
| 486   | NACRS          | 3OT20 | Computerized tomography [CT], abdominal cavity                                    | once                     |

| Rank | Data Dimension | Code | Description of covariate                                                                       | Type of binary covariate |
|------|----------------|------|------------------------------------------------------------------------------------------------|--------------------------|
| 487  | OHIP           | 530  | Esophagitis, cardiospasm, ulcer of esophagus; stricture, stenosis, or obstruction of esophagus | frequent                 |
| 488  | ODB            |      | ACETAMINOPHEN                                                                                  | frequent                 |
| 489  | ODB            |      | ETHINYLESTRADIOL & NORETHINDRONE ACETATE                                                       | once                     |
| 490  | OHIP           | 388  | Wax or cerumen in ear, other disorders of ear and mastoid, tinnitus                            | frequent                 |
| 491  | ODB            |      | NAPROXEN                                                                                       | once                     |
| 492  | NACRS          | K80  | Cholelithiasis                                                                                 | once                     |
| 493  | ODB            |      | CLOBETASOL PROPIONATE                                                                          | frequent                 |
| 494  | ODB            |      | CICLESONIDE                                                                                    | once                     |
| 495  | CIHI-DAD       | O70  | Perineal laceration during delivery                                                            | once                     |
| 496  | NACRS          | S30  | Superficial injury of abdomen, lower back and pelvis                                           | once                     |
| 497  | ODB            |      | INJECTABLE MIXTURE                                                                             | frequent                 |
| 498  | ODB            |      | METFORMIN HCL                                                                                  | once                     |
| 499  | OHIP           | 682  | Cellulitis, abscess                                                                            | once                     |
| 500  | OHIP           | 356  | Idiopathic peripheral neuritis                                                                 | once                     |

Abbreviations: ODB: Ontario Drug Benefit program; CIHI-DAD: Canadian Institute of Health Information Discharge Abstract Database (Hospitalization diagnostic and procedure codes), using the International Statistical Classification of Diseases and Related Health Problems, Tenth Revision, Canada (ICD-10-CA) and the Canadian Classification of Health Interventions (CCI); NACRS: National Ambulatory Care Reporting System (emergency department diagnostic and procedure codes), using the International Statistical Classification of Diseases and Related Health Problems, Tenth Revision, Canada (ICD-10-CA) and the Canadian Classification of Health Interventions (CCI); OHIP: Ontario Health Insurance Plan (Physician diagnostic claim codes)

**Table S3. Main maternal medical and perinatal outcomes in the matched cohort of 1021 antipsychotic users vs. 1021 non-users, presented by the timing of medication exposure in pregnancy.**

| <b>Timing of exposure in pregnancy</b>                                         | <b>Outcome</b>                                                               | <b>Medication exposure group</b> | <b>No. (%) with outcome</b> | <b>Relative risk (95% CI)</b> | <b>Adjusted relative risk* (95% CI)</b> |
|--------------------------------------------------------------------------------|------------------------------------------------------------------------------|----------------------------------|-----------------------------|-------------------------------|-----------------------------------------|
| <b>First trimester, &lt; 12 weeks gestation (n = 893 per exposure group)</b>   | <b>Main maternal medical outcomes</b>                                        |                                  |                             |                               |                                         |
|                                                                                | <i>Gestational diabetes mellitus</i>                                         | Non-users                        | 56 (6.3)                    | 1.00 (Referent)               | 1.00 (Referent)                         |
|                                                                                |                                                                              | Antipsychotic users              | 64 (7.2)                    | 1.14 (0.80-1.64)              | 1.12 (0.77-1.62)                        |
|                                                                                | <i>Hypertensive disorders of pregnancy</i>                                   | Non-users                        | 35 (3.9)                    | 1.00 (Referent)               | 1.00 (Referent)                         |
|                                                                                |                                                                              | Antipsychotic users              | 41 (4.6)                    | 1.17 (0.75-1.84)              | 1.16 (0.70-1.93)                        |
|                                                                                | <i>Venous thromboembolism</i>                                                | Non-users                        | 11 (1.2)                    | 1.00 (Referent)               | NR                                      |
|                                                                                |                                                                              | Antipsychotic users              | 9 (1.0)                     | 0.82 (0.34-1.97)              | NR                                      |
|                                                                                | <b>Main perinatal outcomes</b>                                               |                                  |                             |                               |                                         |
|                                                                                | <i>Preterm birth &lt; 37 weeks gestation</i>                                 | Non-users                        | 131 (14.7)                  | 1.00 (Referent)               | 1.00 (Referent)                         |
|                                                                                |                                                                              | Antipsychotic users              | 133 (14.9)                  | 1.01 (0.80-1.29)              | 0.99 (0.77-1.27)                        |
|                                                                                | <i>Small for gestational age birthweight &lt; 3<sup>rd</sup> percentile</i>  | Non-users                        | 45 (5.1)                    | 1.00 (Referent)               | 1.00 (Referent)                         |
|                                                                                |                                                                              | Antipsychotic users              | 61 (6.9)                    | 1.33 (0.91-1.96)              | 1.33 (0.88-2.02)                        |
|                                                                                | <i>Large for gestational age birthweight &gt; 97<sup>th</sup> percentile</i> | Non-users                        | 20 (2.3)                    | 1.00 (Referent)               | 1.00 (Referent)                         |
|                                                                                |                                                                              | Antipsychotic users              | 28 (3.2)                    | 1.47 (0.82-2.64)              | 0.94 (0.46-1.93)                        |
| <b>Second trimester, 13 to 26 weeks gestation (n = 758 per exposure group)</b> | <b>Main maternal medical outcomes</b>                                        |                                  |                             |                               |                                         |
|                                                                                | <i>Gestational diabetes mellitus</i>                                         | Non-users                        | 52 (6.9)                    | 1.00 (Referent)               | 1.00 (Referent)                         |
|                                                                                |                                                                              | Antipsychotic users              | 56 (7.4)                    | 1.08 (0.74-1.57)              | 1.06 (0.71-1.57)                        |
|                                                                                | <i>Hypertensive disorders of pregnancy</i>                                   | Non-users                        | 34 (4.5)                    | 1.00 (Referent)               | 1.00 (Referent)                         |
|                                                                                |                                                                              | Antipsychotic users              | 36 (4.8)                    | 1.06 (0.66-1.69)              | 1.03 (0.61-1.75)                        |
|                                                                                | <i>Venous thromboembolism</i>                                                | Non-users                        | 7 (0.9)                     | 1.00 (Referent)               | NR                                      |
|                                                                                |                                                                              | Antipsychotic users              | 8 (1.1)                     | 1.14 (0.42-3.15)              | NR                                      |
|                                                                                | <b>Main perinatal outcomes</b>                                               |                                  |                             |                               |                                         |
|                                                                                | <i>Preterm birth &lt; 37 weeks gestation</i>                                 | Non-users                        | 101 (13.3)                  | 1.00 (Referent)               | 1.00 (Referent)                         |
|                                                                                |                                                                              | Antipsychotic users              | 111 (14.6)                  | 1.10 (0.83-1.44)              | 1.00 (0.75-1.35)                        |
|                                                                                | <i>Small for gestational age birthweight &lt; 3<sup>rd</sup> percentile</i>  | Non-users                        | 38 (5.1)                    | 1.00 (Referent)               | 1.00 (Referent)                         |
| Antipsychotic users                                                            |                                                                              | 46 (6.2)                         | 1.22 (0.79-1.88)            | 1.21 (0.74-1.96)              |                                         |

| Timing of exposure in pregnancy                                    | Outcome                                                                      | Medication exposure group | No. (%) with outcome | Relative risk (95% CI)  | Adjusted relative risk* (95% CI) |
|--------------------------------------------------------------------|------------------------------------------------------------------------------|---------------------------|----------------------|-------------------------|----------------------------------|
|                                                                    | <i>Large for gestational age birthweight &gt; 97<sup>th</sup> percentile</i> | Non-users                 | 15 (2.0)             | 1.00 (Referent)         | 1.00 (Referent)                  |
|                                                                    |                                                                              | Antipsychotic users       | 31 (4.1)             | <b>2.21 (1.18-4.16)</b> | 1.83 (0.89-3.77)                 |
| Third trimester, > 26 weeks gestation (n = 614 per exposure group) | <b>Main maternal medical outcomes</b>                                        |                           |                      |                         |                                  |
|                                                                    | <i>Gestational diabetes mellitus</i>                                         | Non-users                 | 43 (7.0)             | 1.00 (Referent)         | 1.00 (Referent)                  |
|                                                                    |                                                                              | Antipsychotic users       | 47 (7.7)             | 1.09 (0.72-1.65)        | 1.04 (0.66-1.63)                 |
|                                                                    | <i>Hypertensive disorders of pregnancy</i>                                   | Non-users                 | 30 (4.9)             | 1.00 (Referent)         | 1.00 (Referent)                  |
|                                                                    |                                                                              | Antipsychotic users       | 28 (4.6)             | 0.93 (0.56-1.56)        | 0.94 (0.53-1.67)                 |
|                                                                    | <i>Thromboembolic disease</i>                                                | Non-users                 | 6 (1.0)              | 1.00 (Referent)         | NR                               |
|                                                                    |                                                                              | Antipsychotic users       | 7 (1.1)              | 1.17 (0.39-3.47)        | NR                               |
|                                                                    | <b>Main perinatal outcomes</b>                                               |                           |                      |                         |                                  |
|                                                                    | <i>Preterm birth &lt; 37 weeks gestation</i>                                 | Non-users                 | 85 (13.8)            | 1.00 (Referent)         | 1.00 (Referent)                  |
|                                                                    |                                                                              | Antipsychotic users       | 74 (12.1)            | 0.87 (0.64-1.19)        | 0.83 (0.59-1.16)                 |
|                                                                    | <i>Small for gestational age birthweight &lt; 3<sup>rd</sup> percentile</i>  | Non-users                 | 28 (4.7)             | 1.00 (Referent)         | 1.00 (Referent)                  |
|                                                                    |                                                                              | Antipsychotic users       | 35 (5.8)             | 1.25 (0.76-2.06)        | 1.24 (0.73-2.10)                 |
|                                                                    | <i>Large for gestational age birthweight &gt; 97<sup>th</sup> percentile</i> | Non-users                 | 11 (1.8)             | 1.00 (Referent)         | 1.00 (Referent)                  |
|                                                                    |                                                                              | Antipsychotic users       | 27 (4.4)             | <b>2.46 (1.22-4.95)</b> | 2.39 (1.00-5.75)                 |

\* Adjusted for a prescribed Selective Serotonin Reuptake Inhibitor (SSRI), non-SSRI, mood stabilizer and/or benzodiazepine medication during the index pregnancy.

NR Not reportable due to counts  $\leq 5$ , or due to non-convergence of the adjusted model.

**Table S4. Sensitivity analyses for the secondary outcomes of congenital malformations and the neonatal adaptation syndrome in the unmatched cohort of 1209 antipsychotic users vs. 40,314 non-users, as well as in the matched cohort of 1021 antipsychotic users vs. 1021 non-users, presented by the timing of medication exposure in pregnancy.**

| Outcome by timing of exposure                                                | Medication exposure group | Unmatched cohort     |                         | Matched cohort       |                        |                                  |
|------------------------------------------------------------------------------|---------------------------|----------------------|-------------------------|----------------------|------------------------|----------------------------------|
|                                                                              |                           | No. (%) with outcome | Relative risk (95% CI)  | No. (%) with outcome | Relative risk (95% CI) | Adjusted relative risk* (95% CI) |
| <b>Congenital malformations</b>                                              |                           |                      |                         |                      |                        |                                  |
| <i>Exposure in any trimester of pregnancy</i>                                | Non-users                 | 1589 (4.0)           | 1.00 (Referent)         | 40 (4.0)             | 1.00 (Referent)        | 1.00 (Referent)                  |
|                                                                              | Antipsychotic users       | 50 (4.2)             | 1.05 (0.79-1.41)        | 44 (4.4)             | 1.10 (0.72-1.69)       | 1.19 (0.75-1.91)                 |
| <i>Exposure only in the first trimester of pregnancy</i> <sup>†</sup>        | Non-users                 | 1589 (4.0)           | 1.00 (Referent)         | 33 (3.8)             | 1.00 (Referent)        | 1.00 (Referent)                  |
|                                                                              | Antipsychotic users       | 45 (4.3)             | 1.07 (0.80-1.44)        | 40 (4.5)             | 1.21 (0.76-1.92)       | 1.37 (0.82-2.29)                 |
| <b>Neonatal adaption syndrome</b>                                            |                           |                      |                         |                      |                        |                                  |
| <i>Exposure in any trimester of pregnancy</i>                                | Non-users                 | 858 (2.1)            | 1.00 (Referent)         | 111 (10.9)           | 1.00 (Referent)        | 1.00 (Referent)                  |
|                                                                              | Antipsychotic users       | 161 (13.3)           | <b>7.06 (5.91-8.45)</b> | 132 (12.9)           | 1.19 (0.92-1.53)       | 1.15 (0.88-1.50)                 |
| <i>Exposure only the first or second trimester of pregnancy</i> <sup>‡</sup> | Non-users                 | 858 (2.1)            | 1.00 (Referent)         | 12 (8.0)             | 1.00 (Referent)        | 1.00 (Referent)                  |
|                                                                              | Antipsychotic users       | 21 (11.7)            | <b>5.49 (3.56-8.46)</b> | 18 (11.9)            | 1.50 (0.72-3.11)       | 1.65 (0.62-4.39)                 |
| <i>Exposure only the third trimester of pregnancy</i> <sup>§</sup>           | Non-users                 | 858 (2.1)            | 1.00 (Referent)         | 61 (9.9)             | 1.00 (Referent)        | 1.00 (Referent)                  |
|                                                                              | Antipsychotic users       | 100 (13.4)           | <b>6.29 (5.11-7.74)</b> | 76 (12.4)            | 1.25 (0.89-1.75)       | 1.31 (0.91-1.90)                 |

\* Adjusted for a prescribed Selective Serotonin Reuptake Inhibitor (SSRI), non-SSRI, mood stabilizer and/or benzodiazepine medication during the index pregnancy.

<sup>†</sup> Exposure restricted to  $\leq 12$  weeks gestation. For the unmatched cohort, there are 1059 women with an antipsychotic medication exposure and 39,965 women with no antipsychotic exposure. For the matched cohort, there are 893 women with an antipsychotic medication exposure and 893 women with no antipsychotic exposure.

<sup>‡</sup> Exposure restricted to  $\leq 26$  weeks gestation. For the unmatched cohort, there are 180 women with an antipsychotic medication exposure and 40,314 women with no antipsychotic medication exposure. For the matched cohort, there are 151 women with an antipsychotic medication exposure and 151 women with no antipsychotic medication exposure.

<sup>§</sup> Exposure restricted to  $> 26$  weeks gestation. For the unmatched cohort, there are 747 women with an antipsychotic medication exposure and 40,314 women with no antipsychotic medication exposure. For the matched cohort, there are 614 women with an antipsychotic medication exposure and 614 women with no antipsychotic medication exposure.

Table S5. Sensitivity analyses for the main maternal and perinatal outcomes, and for secondary outcome of congenital malformations in the matched cohort, restricting to pairs where there was no antipsychotic prescription in the 1 to 60 days prior to conception (946 antipsychotic users and 946 non-users).

| Outcome                                                                      | Medication exposure group | N(%) with outcome | Relative risk (95% CI)  | Adjusted relative risk* (95% CI) |
|------------------------------------------------------------------------------|---------------------------|-------------------|-------------------------|----------------------------------|
| <b>Main maternal medical outcomes</b>                                        |                           |                   |                         |                                  |
| <i>Gestational diabetes</i>                                                  | Non-users                 | 59 (6.2)          | 1.00 (Referent)         | 1.00 (Referent)                  |
|                                                                              | Antipsychotic users       | 67 (7.1)          | 1.14 (0.80-1.61)        | 1.08 (0.74-1.56)                 |
| <i>Hypertensive disorders of pregnancy</i>                                   | Non-users                 | 41 (4.3)          | 1.00 (Referent)         | 1.00 (Referent)                  |
|                                                                              | Antipsychotic users       | 46 (4.9)          | 1.12 (0.74-1.71)        | 1.09 (0.68-1.76)                 |
| <i>Venous thromboembolism</i>                                                | Non-users                 | 12 (1.3)          | 1.00 (Referent)         | 1.00 (Referent)                  |
|                                                                              | Antipsychotic users       | 11 (1.2)          | 0.92 (0.41-2.08)        | 0.95 (0.38-2.37)                 |
| <b>Main perinatal outcomes</b>                                               |                           |                   |                         |                                  |
| <i>Preterm birth &lt; 37 weeks gestation</i>                                 | Non-users                 | 141 (14.9)        | 1.00 (Referent)         | 1.00 (Referent)                  |
|                                                                              | Antipsychotic users       | 141 (14.9)        | 1.00 (0.79-1.26)        | 0.98 (0.76-1.25)                 |
| <i>Small for gestational age birthweight &lt; 3<sup>rd</sup> percentile</i>  | Non-users                 | 49 (5.3)          | 1.00 (Referent)         | 1.00 (Referent)                  |
|                                                                              | Antipsychotic users       | 56 (6.0)          | 1.17 (0.79-1.72)        | 1.17 (0.77-1.82)                 |
| <i>Large for gestational age birthweight &gt; 97<sup>th</sup> percentile</i> | Non-users                 | 19 (2.1)          | 1.00 (Referent)         | 1.00 (Referent)                  |
|                                                                              | Antipsychotic users       | 34 (3.6)          | <b>1.89 (1.02-3.34)</b> | 1.53 (0.79-2.97)                 |
| <i>Congenital Anomalies</i>                                                  | Non-users                 | 37 (4.0)          | 1.00 (Referent)         | 1.00 (Referent)                  |
|                                                                              | Antipsychotic users       | 42 (4.5)          | 1.14 (0.73-1.77)        | 1.26 (0.77-2.06)                 |

\* Adjusted for a prescribed Selective Serotonin Reuptake Inhibitor (SSRI), non-SSRI, mood stabilizer and/or benzodiazepine medication during the index pregnancy.
